# Supplementary material for: Nacre-mimetic composite with intrinsic self-healing and shape-programming capability
Source: PubMed Central journal article supplement (PMC6379389; doi:10.1038/s41467-019-08643-x), 2019-02-18
Supplement: 41467_2019_8643_MOESM2_ESM.pdf [file 41467_2019_8643_MOESM2_ESM.pdf]

## **Description of Additional Supplementary Files**

File Name: Supplementary Movie 1

Description: Surface scratch erasing process for the neat polymer.

File Name: Supplementary Movie 2

Description: Confined molecular mobility of polymer within the nacreous architecture.

File Name: Supplementary Movie 3

Description: Shape recovery of neat polymer and smart nacre under a 50 gram load.
